# Supplementary material
Source: Springer Nature journal article supplement (https://www.springermedizin.de/resource/supplementary/13054_2005_3717_MOESM8_ESM.pdf/9721134)

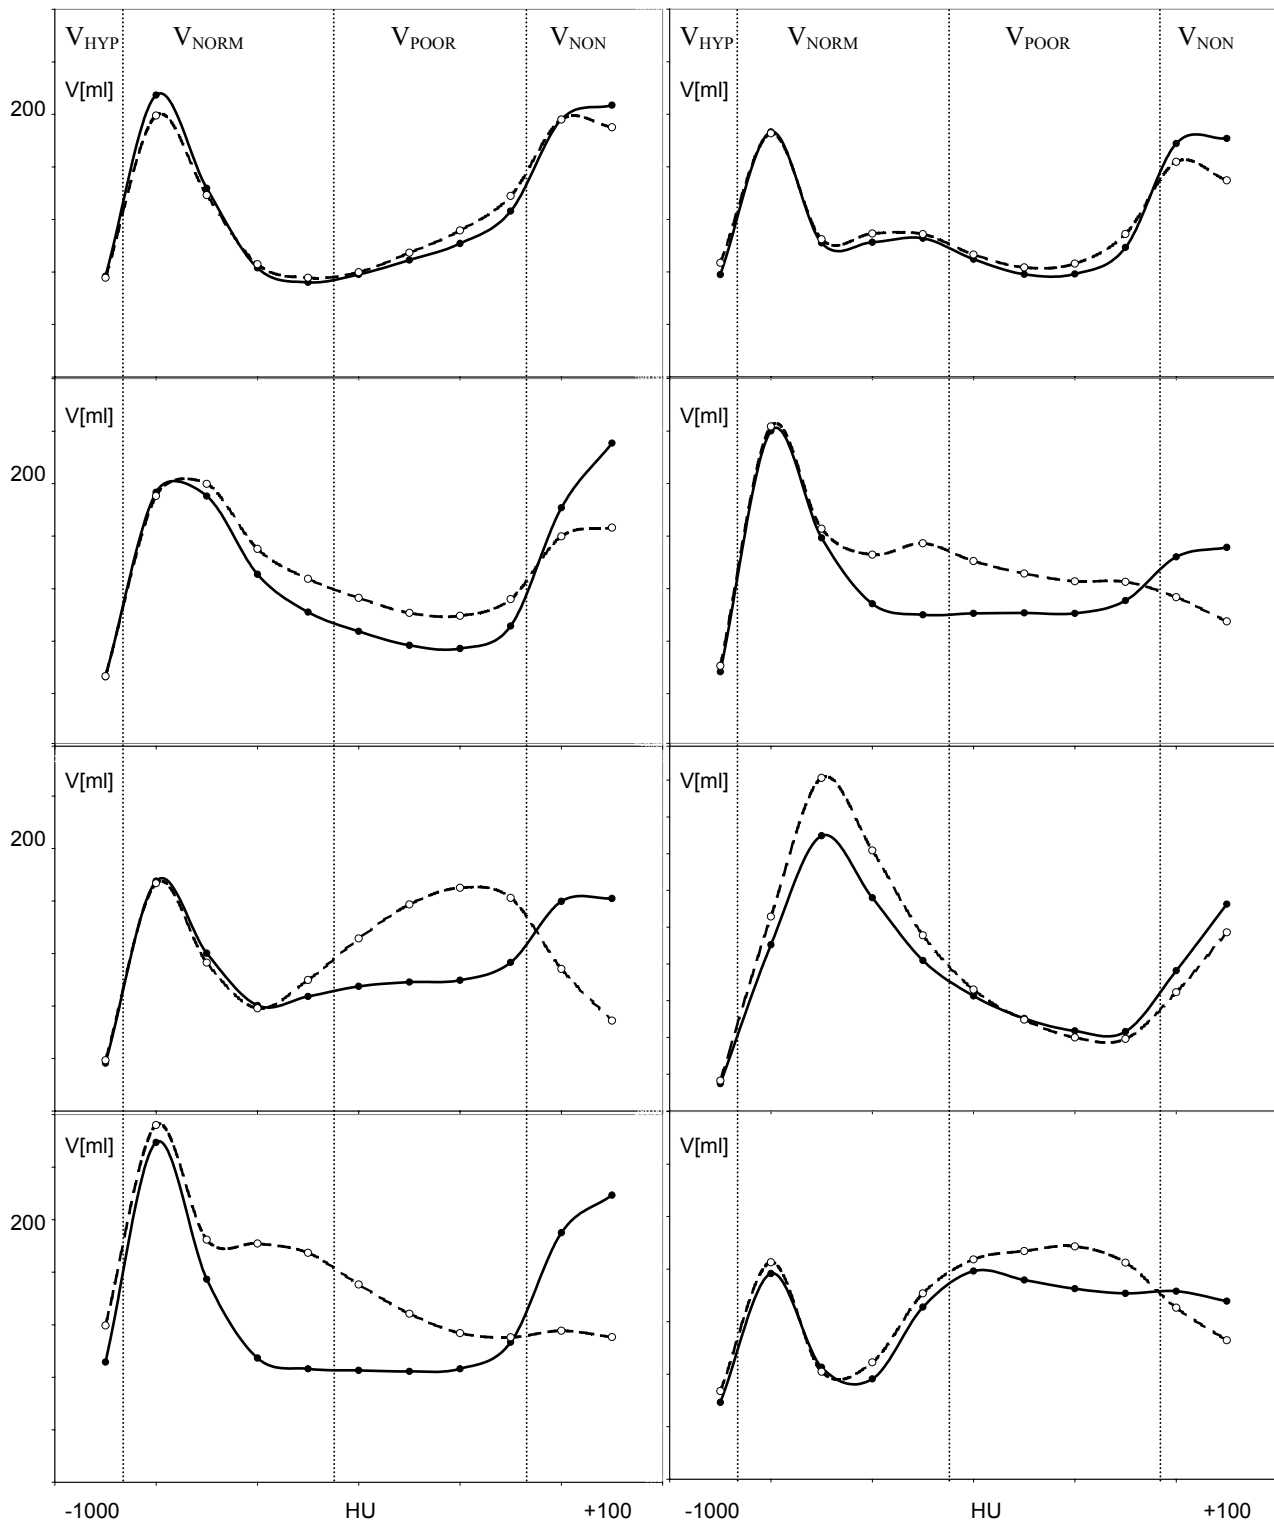

Supplement: MOESM8 [file 9721134]
